# Supplementary material for: Growth–defence trade-off in rice: fast-growing and acquisitive genotypes have lower expression of genes involved in immunity
Source: PubMed Central journal article supplement (PMC10199124; doi:10.1093/jxb/erad071), 2023-02-25
Supplement: erad071_suppl_supplementary_material.pdf [file erad071_suppl_supplementary_material.pdf]

# Supplementary Material

## Growth-defence trade-off in rice: fast-growing and acquisitive genotypes have lower expression of genes involved in immunity

Journal of Experimental Botany

Felix de Tombeur<sup>1,2,\*,@</sup>, Rémi Pélissier<sup>3,@</sup>, Ammar Shihan<sup>1</sup>, Koloïna Rahajaharilaza<sup>4,5,6</sup>, Florian Fort<sup>7</sup>, Lucie Mahaut<sup>1</sup>, Taïna Lemoine<sup>1</sup>, Sarah J. Thorne<sup>8</sup>, Sue E. Hartley<sup>8</sup>, Delphine Luquet<sup>5,6</sup>, Denis Fabre<sup>5,6</sup>, Hans Lambers<sup>2</sup>, Jean-Benoît Morel<sup>3</sup>, Elsa Ballini<sup>3</sup>, Cyrille Violle<sup>1</sup>

<sup>1</sup>CEFE, Univ Montpellier, CNRS, EPHE, IRD, Montpellier, France

<sup>2</sup>School of Biological Sciences and Institute of Agriculture, The University of Western Australia, Perth, Australia

<sup>3</sup>PHIM Plant Health Institute, Univ Montpellier, Institut Agro, INRAE, CIRAD, Montpellier, France

<sup>4</sup>University of Antananarivo, Doctoral School Life and Environmental Sciences (ED SVE)

<sup>5</sup>UMR AGAP Institut, Univ Montpellier, CIRAD, INRAE, Institut Agro, Montpellier, France.

<sup>6</sup>CIRAD, UMR AGAP Institut, F-34398 Montpellier, France.

<sup>7</sup>CEFE, Université Montpellier, Institut Agro, CNRS, EPHE, IRD, Université Valéry, Montpellier, France

<sup>8</sup>School of Biosciences, University of Sheffield, Sheffield, United Kingdom

\*Corresponding author ; felix.detombeur@cefe.cnrs.fr

@equal contribution

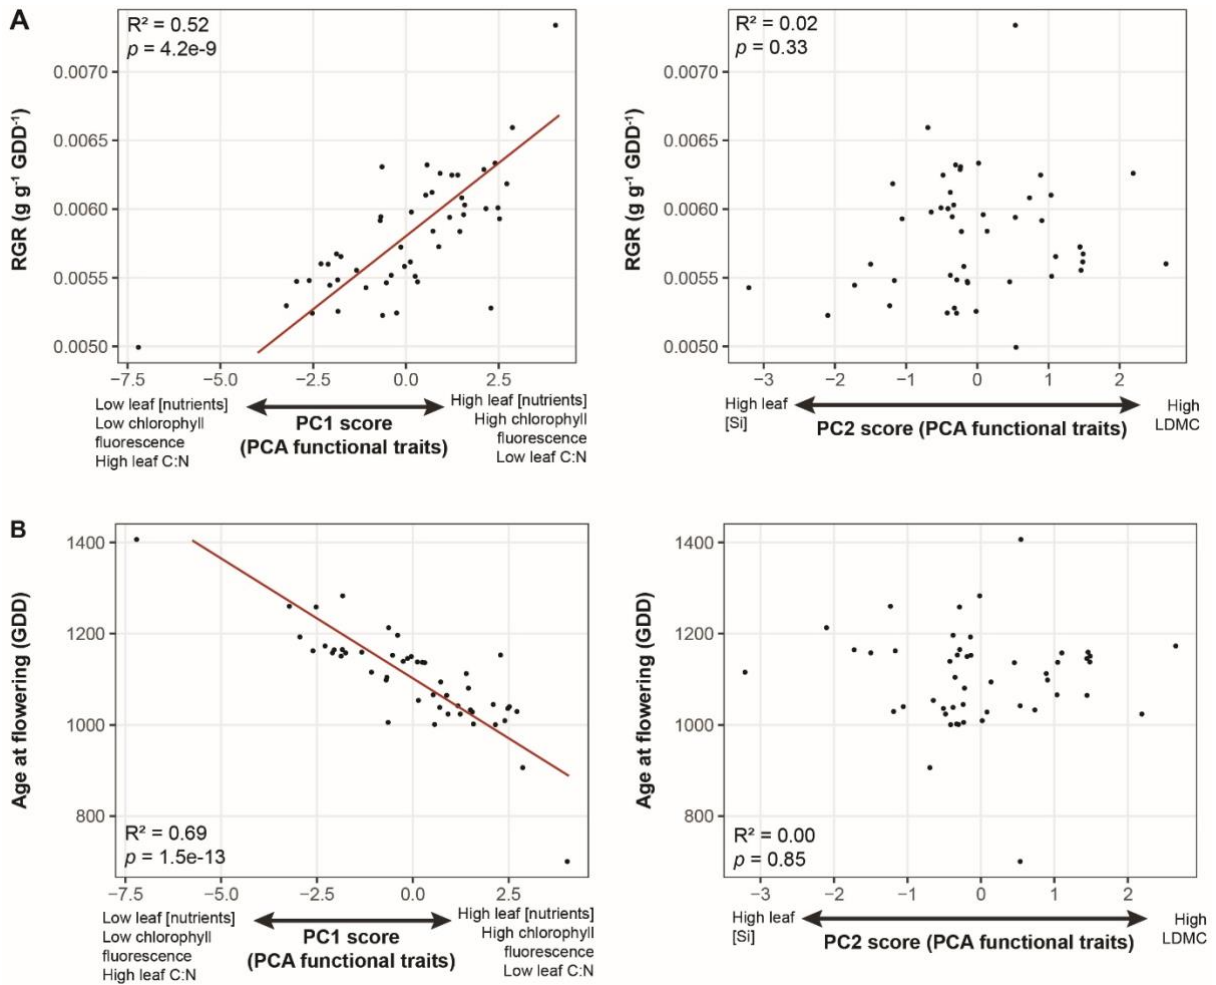

**Fig. S1** – Relationships between genotype scores on both PCs of the PCA considering functional traits (Fig. 1A) and genotypes (A) relative growth rate (RGR) and (B) age at flowering. Standardised major axis (SMA) regression lines and statistics of bivariate relationships are given.

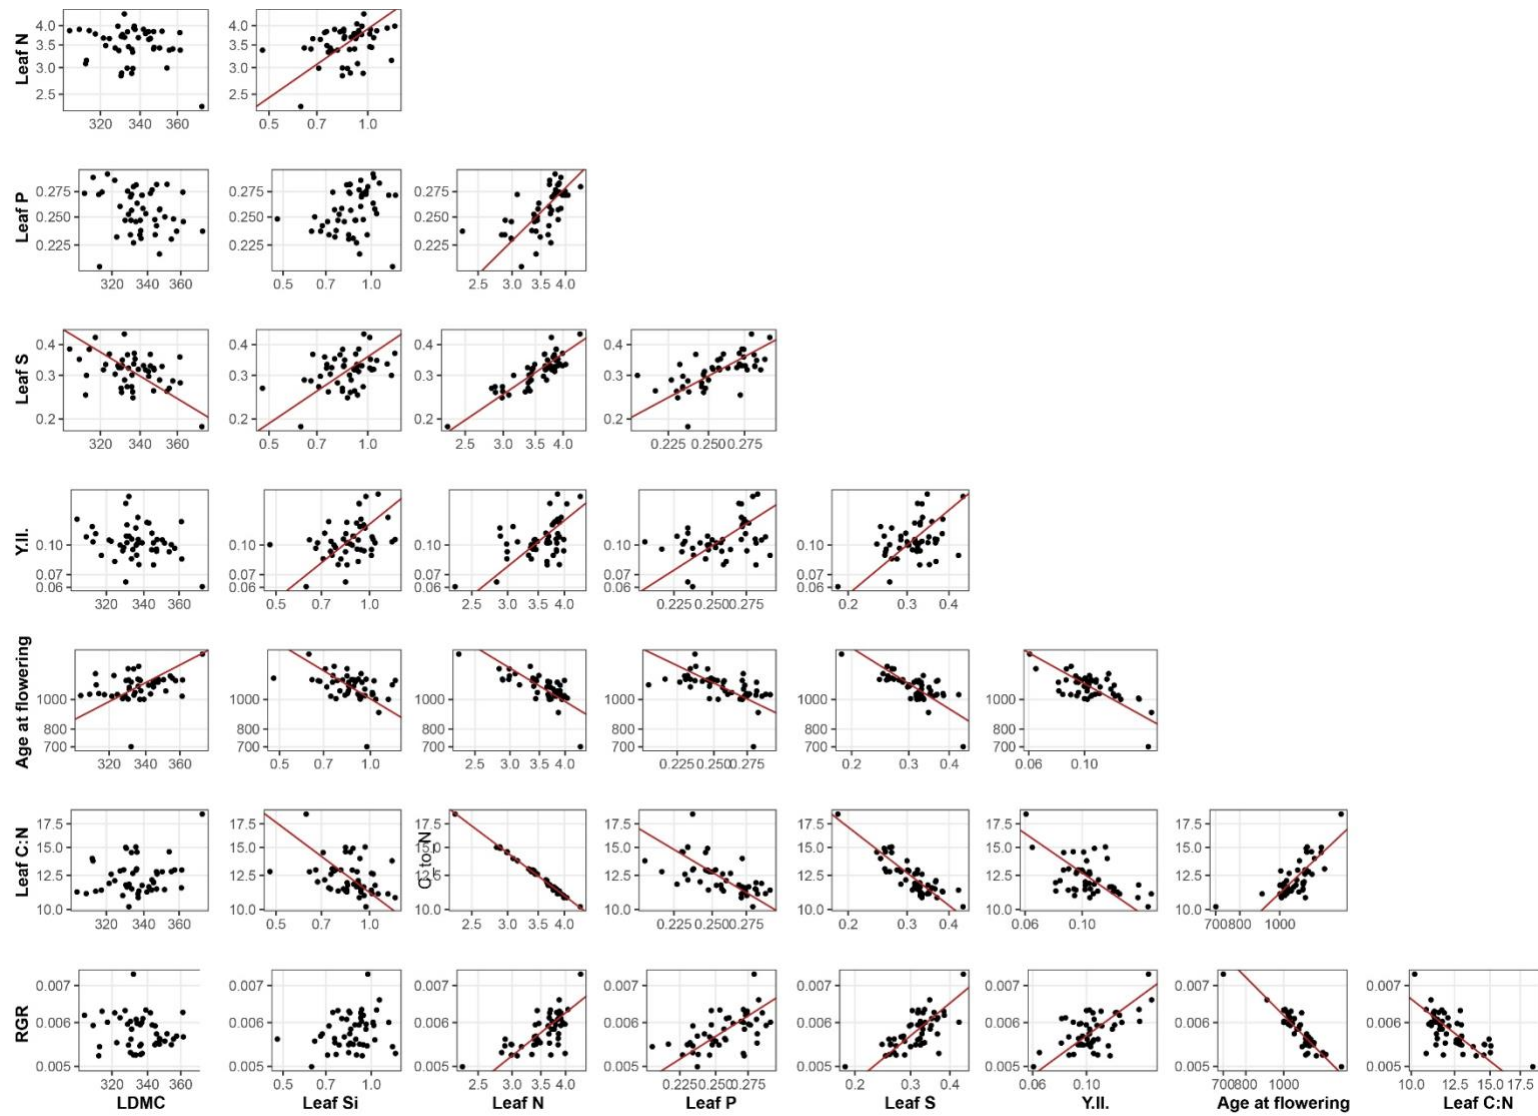

**Fig. S2** – Bivariate relationships between traits used to build the phenotypic space (Fig. 1A). Standardised major axis (SMA) regression lines are shown when  $p < 0.05$ , and statistics of bivariate relationships are given in Table S4. Y-axes are on a logarithmic scale.

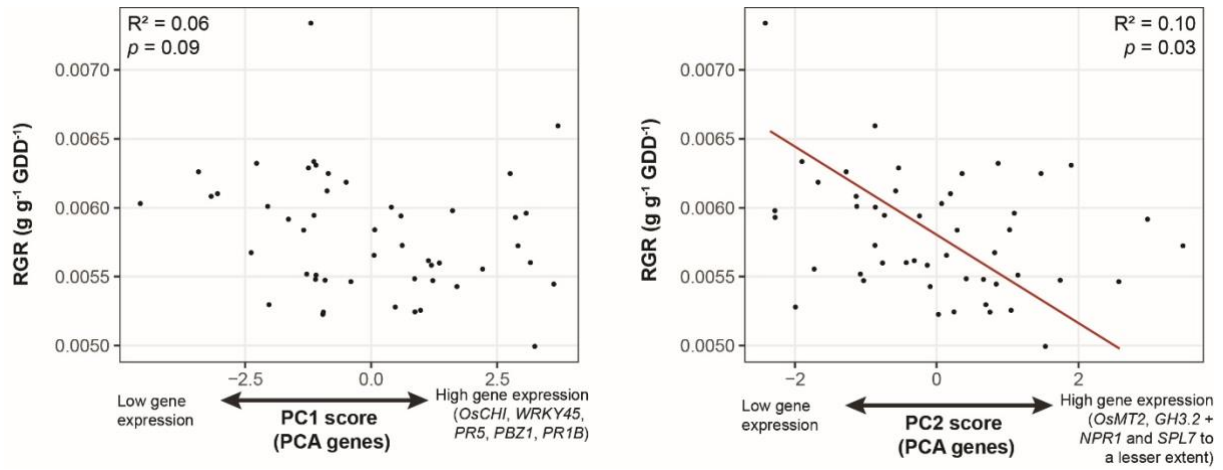

**Fig. S3** – Relationships between genotype scores on both PCs of the PCA considering genes expression (Fig. 1B) and genotypes relative growth rates (RGR). Standardised major axis (SMA) regression lines and statistics of bivariate relationships are given.

**Table S1** – List of the 49 rice genotypes used in this study, and countries of origin.

| <b>Genotype</b> | <b>Country of origin</b> |
|-----------------|--------------------------|
| ARELATE         | France                   |
| ARIETE          | Italy                    |
| AUGUSTO         | Italy                    |
| BALDO 363       | Italy                    |
| BARAGGIA        | Italy                    |
| BRIO            | Italy                    |
| CALMOCHI 101    | Italy                    |
| CAPATAZ         | Spain                    |
| CARINA          | Bulgaria                 |
| CARNAROLI       | France                   |
| CIGALON         | France                   |
| CINIA 40        | Chile                    |
| COLINA          | Spain                    |
| ERCOLE          | Italy                    |
| GAGERON         | France                   |
| GINES           | France                   |
| GRITNA          | Italy                    |
| IBO 380/33      | France                   |
| JEFFERSON       | USA                      |
| KITAAKE         | Japan                    |
| KORAL           | Italy                    |
| KULON           | Russia                   |
| LIDO            | Italy                    |
| LOMELLINO       | Italy                    |
| LUNA            | USA                      |
| LUXOR           | Italy                    |
| M202            | France                   |
| M204            | France                   |
| MARATELLI       | Italy                    |
| MESTRE          | Italy                    |
| NIPPONBARE      | Japan                    |
| OPALE           | Italy                    |
| OTA             | Portugal                 |
| PIEMONTE        | Italy                    |
| RIBE            | France                   |
| RODINA          | Bulgaria                 |
| S 101           | USA                      |
| SAFARI          | Portugal                 |
| SAVIO           | Italy                    |
| SELENIO         | Italy                    |
| SENIA           | Spain                    |
| SESIA           | Italy                    |
| SR 113          | Spain                    |
| TOPAZIO         | Italy                    |
| UPLA            | France                   |
| VALTEJO         | Portugal                 |
| VIALONE         | Italy                    |
| VICTORIA        | Argentina                |
| VOLANO          | Italy                    |

**Table S2** – IDs and origins of marker genes used for expression analysis.

| <b>Gene LOC</b>  | <b>Gene ID</b> | <b>Gene name</b> | <b>Process</b> | <b>Forward primer</b>   | <b>Reverse primer</b>    | <b>Reference</b>             |
|------------------|----------------|------------------|----------------|-------------------------|--------------------------|------------------------------|
| LOC_Os05g25770   | Os05g0322900   | <i>OsWRKY45</i>  | Defense        | ACGACGAGGTTGTCTTCGATCTG | GCCCGTGTCCATCCATGATTCTTC | Shimono <i>et al.</i> , 2007 |
| LOC_Os01g09800   | Os01g0194300   | <i>OsNPR1</i>    | Defense        | CCTGATGGTTGCCTTCTGTG    | ATTCAAGCACTTGTATTACACCTC | Yuan <i>et al.</i> , 2007    |
| LOC_Os10g28080.1 | Os10g0416500   | <i>OsCHI</i>     | Defense        | TTAACGGCGCTGCTACCATT    | TCCCATCCTTACTGCCGA       | Feng <i>et al.</i> , 2011    |
| LOC_Os01g74300   | Os01g0974200   | <i>OsMT2b</i>    | Defense        | ACCGTCGTCGTCGTTGTGAG    | GCATGAGGAGATGGAGCAGGAG   | Hann <i>et al.</i> , 2004    |
| LOC_Os12g36880.1 | Os12g0555500   | <i>OsPBZ1</i>    | Defense        | CCTGCCGAATACGCCTAAGATG  | AGAACACATTCAGACTTGCCTCTC | Delteil <i>et al.</i> , 2012 |
| LOC_Os07g48020.1 | Os07g48020     | <i>OsPOX223</i>  | Defense        | CTCAGCTGCTCCAAGGTGAA    | TGTGGCCCCGTTATGTGTC      | Vergne <i>et al.</i> , 2010  |
| LOC_Os01g28450.1 | Os01g28450     | <i>OsPR1b</i>    | Defense        | CGAGAAGAGCGACTACGACTAC  | GCCTCTGTCCGACGAAGTTG     | Agrawal <i>et al.</i> , 2001 |
| LOC_Os12g43430.1 | Os12g0628600   | <i>OsPR5</i>     | Defense        | AGCCAGGACTTCTACGACCT    | GCGTGTGTCTTGGTGTGTC      | Delteil <i>et al.</i> , 2012 |
| LOC_Os01g03390.1 | Os01g0124650   | <i>OsRBB12</i>   | Defense        | GTGTGTTGTCTCGTGTGAACG   | TACGATGACAGCGCAACATG     | Delteil <i>et al.</i> , 2012 |
| LOC_Os05g45410.1 | Os05g0530400   | <i>OsSPL7</i>    | Defense        | CGGATTAGAGGCTTGCCTGTTAC | GCACAGTAGTCAGCGGATAGAAC  | Delteil <i>et al.</i> , 2012 |
| LOC_Os01g55940.1 | Os01g0764800   | <i>OsGH3.2</i>   | Defense, Auxin | AGCCTTCTACTACAACACTACT  | TGACTGACACCGACTG         | Du <i>et al.</i> , 2012      |

**Table S3** – Results of the principal component analysis (PCA) based on a correlation matrix of the main plant traits for 49 rice genotypes, as shown in Fig. 1A (PC1 and PC2). Relative growth rate (RGR) and age at flowering are supplementary quantitative variables, and have no influence on the PCA results. Data shown are the eigenvalue, the proportion and cumulative proportion of variance explained by each principal component (PC), and the loadings of each trait. The highest loading(s) for each trait was bolded for visualisation. LDMC is leaf dry matter content and Y(II) is chlorophyll fluorescence.

|                         | PC1          | PC2          | PC3          | PC4         |
|-------------------------|--------------|--------------|--------------|-------------|
| <b>Eigenvalue</b>       | 4.1          | 1.2          | 0.7          | 0.5         |
| <b>Variance (%)</b>     | 57.9         | 16.7         | 9.4          | 7.1         |
| <b>Cumulative (%)</b>   | 57.9         | 74.6         | 84.0         | 91.1        |
| LDMC                    | -0.51        | <b>0.71</b>  | 0.22         | -0.23       |
| Leaf Si                 | 0.54         | <b>-0.66</b> | 0.02         | -0.31       |
| Leaf N                  | <b>0.92</b>  | 0.31         | -0.02        | -0.19       |
| Leaf P                  | <b>0.74</b>  | 0.19         | -0.17        | 0.50        |
| Leaf S                  | <b>0.90</b>  | 0.12         | -0.23        | -0.09       |
| Y(II)                   | <b>0.65</b>  | -0.10        | 0.73         | 0.15        |
| Leaf C:N                | <b>-0.93</b> | -0.28        | 0.03         | 0.18        |
| <i>RGR</i>              | <b>0.73</b>  | <i>0.15</i>  | <i>0.14</i>  | <i>0.11</i> |
| <i>Age at flowering</i> | <b>-0.80</b> | <i>-0.03</i> | <i>-0.19</i> | <i>0.01</i> |

**Table S4** – Standardised major axis (SMA) statistics of bivariate relationships between the main plant traits considered in this study. Coefficients of determination ( $r^2$ ) are given in the upper right section of the matrix, and p-values in the lower left section. Significant relationships ( $p$ -values<0.05) are bolded. SMA models were run on log-transformed data. LDMC is leaf dry matter content, Y(II) is chlorophyll fluorescence and RGR is relative growth rate.

|                  | LDMC          | Leaf Si       | Leaf N             | Leaf P        | Leaf S         | Y(II)         | Age at flowering   | Leaf C:N      | RGR         |
|------------------|---------------|---------------|--------------------|---------------|----------------|---------------|--------------------|---------------|-------------|
| LDMC             |               | <b>0.26</b>   | 0.05               | 0.06          | <b>0.17</b>    | 0.08          | <b>0.09</b>        | 0.07          | 0.06        |
| Leaf Si          | <b>2.6e-4</b> |               | <b>0.10</b>        | 0.08          | <b>0.14</b>    | <b>0.12</b>   | <b>0.17</b>        | <b>0.12</b>   | 0.06        |
| Leaf N           | 0.11          | <b>0.03</b>   |                    | <b>0.38</b>   | <b>0.73</b>    | <b>0.27</b>   | <b>0.53</b>        | <b>0.99</b>   | <b>0.46</b> |
| Leaf P           | 0.10          | 0.05          | <b>2.1e-6</b>      |               | <b>0.39</b>    | <b>0.15</b>   | <b>0.31</b>        | <b>0.41</b>   | <b>0.33</b> |
| Leaf S           | <b>4e-3</b>   | <b>7.2e-3</b> | <b>4.7e-15</b>     | <b>1.4e-6</b> |                | <b>0.18</b>   | <b>0.54</b>        | <b>0.74</b>   | <b>0.49</b> |
| Y(II)            | 0.06          | <b>0.01</b>   | <b>1.1e-4</b>      | <b>5.9e-3</b> | <b>2.2e-3</b>  |               | <b>0.44</b>        | <b>0.28</b>   | <b>0.35</b> |
| Age at flowering | <b>0.04</b>   | <b>2.8e-3</b> | <b>6.3e-9</b>      | <b>3.1e-5</b> | <b>2.0e-9</b>  | <b>1.7e-7</b> |                    | <b>0.51</b>   | <b>0.83</b> |
| Leaf C:N         | 0.08          | <b>0.01</b>   | <b>&lt;2.2e-16</b> | <b>7.7e-7</b> | <b>2.9e-15</b> | <b>8.8e-5</b> | <b>7.1e-9</b>      |               | <b>0.45</b> |
| RGR              | 0.10          | 0.09          | <b>8.4e-8</b>      | <b>1.5e-5</b> | <b>1.7e-8</b>  | <b>6.9e-6</b> | <b>&lt;2.2e-16</b> | <b>1.3e-7</b> |             |

**Table S5** – Genotype-mean values of traits used in the PCA describing the phenotypic space of rice (Fig. 1A & Table S3). Relationships between these traits are presented in Table S4.

LDMC is leaf dry matter content, Y(II) is chlorophyll fluorescence and RGR is relative growth rate.

| Genotype        | LDMC<br>(mg g <sup>-1</sup> ) | Leaf Si<br>(% DW) | Leaf N<br>(% DW) | Leaf P<br>(% DW) | Leaf S<br>(% DW) | Y(II) | Age at<br>flowering<br>(GDD) | Leaf<br>C:N | RGR (g<br>g <sup>-1</sup> GDD <sup>-1</sup> ) |
|-----------------|-------------------------------|-------------------|------------------|------------------|------------------|-------|------------------------------|-------------|-----------------------------------------------|
| ARELATE         | 334.0                         | 1.02              | 3.46             | 0.26             | 0.32             | 0.09  | 1054                         | 12.66       | 0.0060                                        |
| ARIETE          | 330.9                         | 0.85              | 3.71             | 0.26             | 0.35             | 0.10  | 1094                         | 11.73       | 0.0058                                        |
| AUGUSTO         | 337.3                         | 0.79              | 3.90             | 0.26             | 0.35             | 0.08  | 1066                         | 11.28       | 0.0061                                        |
| BALDO 363       | -                             | 0.93              | 4.05             | 0.27             | 0.33             | 0.16  | 1009                         | 10.80       | 0.0063                                        |
| BARAGGIA        | 342.8                         | 0.91              | 3.79             | 0.28             | 0.32             | 0.13  | 1042                         | 11.60       | 0.0059                                        |
| BRIO            | 321.5                         | 0.92              | 3.67             | 0.29             | 0.32             | 0.11  | 1024                         | 11.85       | 0.0062                                        |
| CALMOCHI<br>101 | 330.9                         | 0.96              | 3.76             | 0.27             | 0.33             | 0.13  | 1081                         | 11.58       | 0.0058                                        |
| CAPATAZ         | 336.1                         | 0.76              | 3.34             | 0.24             | 0.26             | 0.09  | 1283                         | 13.04       | 0.0053                                        |
| CARINA          | 357.4                         | 0.67              | 3.41             | 0.24             | 0.29             | 0.10  | 1151                         | 12.95       | 0.0057                                        |
| CARNAROLI       | 335.7                         | 0.97              | 2.88             | 0.23             | 0.27             | 0.12  | 1165                         | 15.05       | 0.0054                                        |
| CIGALON         | -                             | 1.07              | 3.86             | 0.28             | 0.35             | 0.19  | 906                          | 11.07       | 0.0066                                        |
| CINIA 40        | 355.5                         | 0.48              | 3.38             | 0.25             | 0.27             | 0.10  | 1173                         | 12.82       | 0.0056                                        |
| COLINA          | 344.4                         | 0.94              | 3.84             | 0.25             | 0.31             | 0.09  | 1136                         | 11.36       | 0.0055                                        |
| ERCOLE          | 332.0                         | 0.89              | 3.69             | 0.23             | 0.29             | 0.11  | 1139                         | 11.79       | 0.0052                                        |
| GAGERON         | 333.3                         | 0.71              | 2.99             | 0.25             | 0.27             | 0.08  | 1258                         | 14.51       | 0.0052                                        |
| GINES           | 347.1                         | 0.75              | 3.84             | 0.26             | 0.32             | 0.09  | 1138                         | 11.43       | 0.0056                                        |
| GRITNA          | 309.8                         | 1.02              | 3.90             | 0.29             | 0.35             | 0.11  | 1040                         | 11.09       | 0.0059                                        |
| IBO 380/33      | 336.3                         | 0.87              | 2.98             | 0.23             | 0.24             | 0.10  | 1162                         | 14.55       | 0.0055                                        |
| JEFFERSON       | 312.8                         | 0.93              | 3.08             | 0.27             | 0.25             | 0.13  | 1213                         | 13.96       | 0.0052                                        |
| KITAAKE         | 331.9                         | 0.97              | 4.34             | 0.28             | 0.44             | 0.18  | 701                          | 10.18       | 0.0073                                        |
| KORAL           | 333.5                         | 0.82              | 3.83             | 0.28             | 0.36             | 0.11  | 1033                         | 11.44       | 0.0061                                        |
| KULON           | 317.5                         | 1.02              | 3.78             | 0.29             | 0.43             | 0.09  | 1036                         | 11.35       | 0.0060                                        |
| LIDO            | 345.3                         | 0.68              | 3.66             | 0.24             | 0.37             | 0.10  | 1146                         | 11.98       | 0.0057                                        |
| LOMELLINO       | 336.7                         | 1.15              | 3.94             | 0.27             | 0.33             | 0.14  | 1000                         | 11.07       | 0.0060                                        |
| LUNA            | 361.5                         | 0.81              | 3.38             | 0.25             | 0.28             | 0.08  | 1158                         | 12.95       | 0.0057                                        |
| LUXOR           | 335.8                         | 0.88              | 3.40             | 0.25             | 0.30             | 0.10  | 1104                         | 12.94       | 0.0059                                        |
| M202            | 347.1                         | 0.91              | 3.41             | 0.22             | 0.26             | 0.10  | 1165                         | 12.81       | 0.0055                                        |
| M204            | 350.3                         | 0.64              | 3.43             | 0.25             | 0.29             | 0.11  | 1159                         | 12.80       | 0.0056                                        |
| MARATELLI       | 361.3                         | 0.74              | 3.81             | 0.27             | 0.36             | 0.13  | 1024                         | 11.52       | 0.0063                                        |
| MESTRE          | 322.6                         | 0.75              | 3.49             | 0.23             | 0.33             | 0.10  | 1197                         | 12.60       | 0.0055                                        |
| NIPPONBARE      | 373.7                         | 0.63              | 2.30             | 0.24             | 0.19             | 0.06  | 1407                         | 18.66       | 0.0050                                        |
| OPALE           | 324.4                         | 0.92              | 3.66             | 0.26             | 0.37             | 0.08  | 1038                         | 12.07       | 0.0061                                        |
| OTA             | 330.2                         | 0.84              | 2.84             | 0.23             | 0.27             | 0.06  | 1260                         | 15.01       | 0.0053                                        |
| PIEMONTE        | 305.2                         | 0.94              | 3.87             | 0.27             | 0.38             | 0.14  | 1029                         | 11.22       | 0.0062                                        |
| RIBE            | 347.4                         | 1.03              | 3.45             | 0.26             | 0.32             | 0.11  | 1150                         | 12.61       | 0.0056                                        |
| RODINA          | 330.3                         | 0.93              | 3.72             | 0.27             | 0.32             | 0.17  | 1002                         | 11.74       | 0.0060                                        |
| S 101           | 345.4                         | 0.85              | 3.67             | 0.28             | 0.33             | 0.08  | 1137                         | 11.91       | 0.0055                                        |
| SAFARI          | 314.6                         | 0.84              | 3.87             | 0.27             | 0.38             | 0.11  | 1045                         | 11.26       | 0.0063                                        |
| SAVIO           | 341.8                         | 0.85              | 3.90             | 0.27             | 0.33             | 0.13  | 1113                         | 11.21       | 0.0062                                        |
| SELENIO         | 328.6                         | 0.96              | 3.99             | 0.28             | 0.33             | 0.09  | 1028                         | 10.95       | 0.0060                                        |
| SENIA           | 337.0                         | 1.21              | 3.99             | 0.27             | 0.37             | 0.11  | 1153                         | 10.80       | 0.0053                                        |
| SESIA           | 329.2                         | 0.78              | 3.37             | 0.25             | 0.32             | 0.10  | 1153                         | 12.96       | 0.0055                                        |
| SR 113          | 313.2                         | 1.18              | 3.15             | 0.21             | 0.30             | 0.10  | 1116                         | 13.74       | 0.0054                                        |
| TOPAZIO         | 327.2                         | 0.77              | 3.43             | 0.25             | 0.30             | 0.10  | 1005                         | 12.87       | 0.0063                                        |
| UPLA            | 354.2                         | 0.84              | 2.99             | 0.23             | 0.26             | 0.09  | 1193                         | 14.58       | 0.0055                                        |
| VALTEJO         | 344.5                         | 0.72              | 3.64             | 0.23             | 0.30             | 0.12  | 1098                         | 12.13       | 0.0059                                        |
| VIALONE         | 339.1                         | 1.04              | 3.68             | 0.25             | 0.32             | 0.10  | 1001                         | 11.71       | 0.0063                                        |
| VICTORIA        | 351.6                         | 0.84              | 3.85             | 0.28             | 0.33             | 0.10  | 1065                         | 11.38       | 0.0057                                        |
| VOLANO          | 330.5                         | 0.89              | 2.89             | 0.25             | 0.26             | 0.11  | 1158                         | 14.91       | 0.0056                                        |



**Table S6** – Results of the principal component analysis (PCA) based on a correlation matrix of gene expressions involved in plant defence for 49 rice genotypes, as shown in Fig. 1B (PC1 and PC2). Relative growth rate (RGR) and age at flowering are supplementary quantitative variables, and have no influence on the PCA results. Data shown are the eigenvalue, the proportion and cumulative proportion of variance explained by each principal component (PC), and the loadings of each trait. The highest loading(s) for each trait was bolded for visualisation.

|                         | PC1         | PC2          | PC3   | PC4         | PC5         |
|-------------------------|-------------|--------------|-------|-------------|-------------|
| <b>Eigenvalue</b>       | 3.9         | 1.8          | 1.3   | 1.3         | 0.9         |
| <b>Variance (%)</b>     | 35.7        | 16.3         | 11.5  | 11.5        | 8.2         |
| <b>Cumulative (%)</b>   | 35.7        | 52.0         | 63.5  | 75.0        | 83.2        |
| <i>NPR1</i>             | <b>0.66</b> | 0.59         | 0.20  | -0.11       | -0.09       |
| <i>OsCHI</i>            | <b>0.81</b> | -0.39        | 0.32  | -0.17       | 0.11        |
| <i>OsMT2</i>            | 0.11        | <b>0.65</b>  | 0.15  | 0.34        | 0.41        |
| <i>PBZ1</i>             | <b>0.66</b> | -0.02        | -0.66 | 0.06        | -0.08       |
| <i>POX223</i>           | 0.13        | 0.04         | 0.22  | <b>0.86</b> | -0.24       |
| <i>PR5</i>              | <b>0.70</b> | -0.36        | 0.00  | 0.48        | -0.11       |
| <i>RBB12</i>            | 0.42        | -0.04        | -0.29 | 0.11        | <b>0.72</b> |
| <i>SPL7</i>             | <b>0.62</b> | 0.47         | -0.44 | -0.04       | -0.17       |
| <i>WRKY45</i>           | <b>0.77</b> | -0.35        | 0.44  | -0.13       | 0.15        |
| <i>GH3.2</i>            | 0.43        | <b>0.60</b>  | 0.36  | -0.23       | -0.13       |
| <i>PR1B</i>             | <b>0.74</b> | -0.20        | -0.13 | -0.19       | -0.23       |
| <i>RGR</i>              | -0.25       | <b>-0.31</b> | -0.14 | 0.21        | 0.22        |
| <i>Age at flowering</i> | 0.18        | <b>0.41</b>  | 0.14  | -0.25       | -0.23       |

**Table S7** – Standardised major axis (SMA) statistics of bivariate relationships between gene expressions considered in this study. Coefficients of determination ( $r^2$ ) are given in the upper right section of the matrix, and p-values in the lower left section. Significant relationships (p-values < 0.05) are bolded. SMA models were run on log-transformed data.

|               | <i>NPR1</i>    | <i>OsCHI</i>       | <i>OsMT2</i> | <i>PBZ1</i>    | <i>POX223</i> | <i>PR5</i>     | <i>RBB12</i> | <i>SPL7</i> | <i>WRKY45</i>  | <i>GH3.2</i> | <i>PR1B</i> |
|---------------|----------------|--------------------|--------------|----------------|---------------|----------------|--------------|-------------|----------------|--------------|-------------|
| <i>NPR1</i>   |                | <b>0.14</b>        | <b>0.12</b>  | <b>0.08</b>    | 0.01          | 0.03           | 0.02         | <b>0.36</b> | <b>0.15</b>    | <b>0.39</b>  | 0.09        |
| <i>OsCHI</i>  | <b>0.008</b>   |                    | 0.01         | <b>0.11</b>    | 0.00          | <b>0.34</b>    | 0.08         | 0.04        | <b>0.94</b>    | 0.04         | <b>0.32</b> |
| <i>OsMT2</i>  | <b>0.01</b>    | 0.53               |              | 0.00           | 0.02          | 0.00           | 0.01         | 0.04        | 0.00           | 0.06         | 0.04        |
| <i>PBZ1</i>   | <b>0.04</b>    | <b>0.02</b>        | 0.92         |                | 0.00          | <b>0.27</b>    | <b>0.11</b>  | <b>0.41</b> | 0.05           | 0.00         | <b>0.27</b> |
| <i>POX223</i> | 0.51           | 0.92               | 0.37         | 0.85           |               | <b>0.17</b>    | 0.00         | 0.00        | 0.00           | 0.00         | 0.00        |
| <i>PR5</i>    | 0.24           | <b>1.2e-5</b>      | 0.83         | <b>1.5e-4</b>  | <b>0.003</b>  |                | 0.05         | 0.06        | <b>0.34</b>    | 0.00         | <b>0.24</b> |
| <i>RBB12</i>  | 0.36           | 0.05               | 0.50         | <b>0.02</b>    | 0.80          | 0.13           |              | 0.05        | 0.06           | 0.00         | 0.08        |
| <i>SPL7</i>   | <b>5.6e-6</b>  | 0.15               | 0.19         | <b>7.6e-7</b>  | 0.88          | 0.09           | 0.12         |             | 0.02           | <b>0.13</b>  | <b>0.09</b> |
| <i>WRKY45</i> | <b>0.006</b>   | <b>&lt;2.2e-16</b> | 0.79         | 0.12           | 0.90          | <b>1.0e-5</b>  | 0.08         | 0.28        |                | 0.05         | <b>0.20</b> |
| <i>GH3.2</i>  | <b>1.5e-06</b> | 0.19               | 0.09         | 0.84           | 0.77          | 0.93           | 0.64         | <b>0.01</b> | 0.11           |              | 0.05        |
| <i>PR1B</i>   | 0.05           | <b>4.9e-05</b>     | 0.20         | <b>2.3e-04</b> | 0.93          | <b>7.0e-04</b> | 0.05         | <b>0.04</b> | <b>2.2e-03</b> | 0.12         |             |

**Table S8** – Genotype-mean values of relative gene expression used in the PCA (Fig. 1B & Table S6). Relationships between these traits are presented in Table S7. Gene expression was calculated by the 2– $\Delta\Delta C_t$  method (Livak and Schmittgen, 2001) using three references genes, EF1a, EF4a and UBQ5, with the R package “*fluidigr*”.

| <b>Genotype</b> | <b><i>NPR1</i></b> | <b><i>OsCHI</i></b> | <b><i>OsMT2</i></b> | <b><i>PBZ1</i></b> | <b><i>POX223</i></b> | <b><i>PR5</i></b> | <b><i>RBB12</i></b> | <b><i>SPL7</i></b> | <b><i>WRKY45</i></b> | <b><i>GH3.2</i></b> | <b><i>PR1B</i></b> |
|-----------------|--------------------|---------------------|---------------------|--------------------|----------------------|-------------------|---------------------|--------------------|----------------------|---------------------|--------------------|
| ARELATE         | 0.75               | 0.63                | 3.30                | 0.010              | 4.37                 | 3.09              | 0.21                | 0.14               | 0.66                 | 0.97                | 0.00020            |
| ARIETE          | 0.81               | 0.14                | 9.77                | 0.021              | 0.42                 | 0.15              | 0.51                | 0.34               | 0.14                 | 1.39                | 0.00004            |
| AUGUSTO         | 0.59               | 0.04                | 7.83                | 0.001              | 0.88                 | 0.10              | 0.96                | 0.07               | 0.03                 | 0.80                | 0.00001            |
| BALDO 363       | 0.49               | 0.34                | 6.04                | 0.002              | 1.65                 | 0.34              | 0.49                | 0.04               | 0.38                 | 0.85                | 0.00001            |
| BARAGGIA        | 0.62               | 0.24                | 6.80                | 0.005              | 3.21                 | 0.79              | 0.50                | 0.13               | 0.25                 | 2.04                | 0.00007            |
| BRIO            | 1.39               | 0.49                | 5.93                | 0.041              | 1.44                 | 0.58              | 2.00                | 0.51               | 0.50                 | 1.50                | 0.00013            |
| CALMOCHI 101    | 0.64               | 0.04                | 3.69                | 0.006              | 1.39                 | 0.28              | 0.48                | 0.25               | 0.04                 | 1.21                | 0.00002            |
| CAPATAZ         | 0.95               | 0.19                | 13.37               | 0.011              | 1.93                 | 0.75              | 0.26                | 0.27               | 0.20                 | 1.75                | 0.00008            |
| CARINA          | 0.95               | 0.04                | 5.80                | 0.002              | 0.46                 | 0.14              | 0.06                | 0.11               | 0.04                 | 1.16                | 0.00003            |
| CARNAROLI       | 1.69               | 0.71                | 5.28                | 0.023              | 1.82                 | 1.01              | 0.13                | 0.37               | 0.67                 | 3.84                | 0.01575            |
| CIGALON         | 0.83               | 0.63                | 4.84                | 0.499              | 0.75                 | 0.78              | 1.69                | 0.82               | 0.25                 | 1.06                | 0.20909            |
| CINIA 40        | 1.50               | 0.64                | 4.54                | 0.095              | 0.86                 | 0.50              | 0.89                | 0.10               | 0.59                 | 2.40                | 0.03534            |
| COLINA          | 0.80               | 0.25                | 2.29                | 0.024              | 2.02                 | 0.91              | 0.66                | 0.34               | 0.27                 | 1.24                | 0.00006            |
| ERCOLE          | 1.20               | 0.47                | 8.01                | 0.000              | 1.13                 | 0.28              | 0.40                | 0.17               | 0.49                 | 1.78                | 0.00220            |
| GAGERON         | 1.03               | 0.07                | 6.03                | 0.007              | 0.62                 | 0.11              | 1.04                | 0.27               | 0.09                 | 0.87                | 0.00001            |
| GINES           | 0.88               | 0.18                | 6.38                | 0.007              | 5.87                 | 1.78              | 0.98                | 0.16               | 0.16                 | 1.40                | 0.00014            |
| GRITNA          | 0.54               | 0.40                | 8.06                | 0.176              | 1.01                 | 6.14              | 1.12                | 0.13               | 0.45                 | 0.98                | 0.03876            |
| IBO 380/33      | 0.79               | 0.07                | 3.03                | 0.008              | 0.77                 | 0.22              | 0.08                | 0.20               | 0.07                 | 2.13                | 0.00002            |
| JEFFERSON       | 0.91               | 0.17                | 3.27                | 0.001              | 0.53                 | 0.17              | 0.41                | 0.09               | 0.17                 | 2.04                | 0.00001            |
| KITAAKE         | 0.31               | 0.13                | 4.72                | 0.020              | 1.34                 | 0.95              | 0.77                | 0.14               | 0.14                 | 0.45                | 0.00000            |
| KORAL           | 0.38               | 0.07                | 2.69                | 0.001              | 0.91                 | 0.05              | 0.84                | 0.06               | 0.07                 | 1.01                |                    |
| KULON           | 0.57               | 0.06                | 1.98                | 0.000              | 2.23                 | 0.15              | 0.26                | 0.07               | 0.07                 | 1.23                | 0.00055            |
| LIDO            | 2.84               | 0.16                | 12.74               | 0.024              | 1.59                 | 0.47              | 1.77                | 0.98               | 0.16                 | 3.13                | 0.00007            |
| LOMELLINO       | 0.55               | 0.22                | 5.39                | 0.012              | 3.22                 | 1.25              | 0.17                | 0.29               | 0.19                 | 1.04                | 0.00006            |
| LUNA            | 0.89               | 0.10                | 3.92                | 0.030              | 1.40                 | 0.50              | 0.12                | 0.39               | 0.08                 | 1.08                | 0.00015            |
| LUXOR           | 0.61               | 0.16                | 3.97                | 0.001              | 0.81                 | 0.15              | 0.67                | 0.09               | 0.15                 | 1.30                |                    |
| M202            | 0.84               | 0.04                | 5.40                | 0.024              | 3.88                 | 1.79              | 0.67                | 0.52               | 0.05                 | 1.13                | 0.00077            |
| M204            | 0.82               | 0.45                | 2.13                | 0.437              | 1.11                 | 0.61              | 0.75                | 0.31               | 0.10                 | 0.87                | 0.08072            |
| MARATELLI       | 0.36               | 0.04                | 2.21                | 0.001              | 0.91                 | 0.18              | 0.13                | 0.10               | 0.04                 | 0.85                | 0.00001            |
| MESTRE          | 0.27               | 0.06                | 2.28                | 0.012              | 0.48                 | 0.31              | 1.90                | 0.18               | 0.05                 | 1.69                | 0.00005            |
| NIPPONBARE      | 1.86               | 0.83                | 5.46                | 0.004              | 1.22                 | 0.28              | 0.26                | 0.96               | 0.77                 | 3.14                |                    |
| OPALE           | 0.78               | 0.23                | 6.89                | 0.002              | 1.88                 | 0.40              | 0.12                | 0.08               | 0.22                 | 1.07                | 0.00001            |
| OTA             | 0.59               | 0.04                | 5.39                | 0.031              | 2.23                 | 0.08              | 0.17                | 0.32               | 0.03                 | 0.81                | 0.00001            |
| PIEMONTE        | 0.70               | 0.14                | 1.70                | 0.001              | 7.66                 | 0.63              | 0.76                | 0.10               | 0.13                 | 1.03                | 0.00005            |
| RIBE            | 0.83               | 0.24                | 3.47                | 0.020              | 1.38                 | 0.54              | 0.76                | 0.29               | 0.24                 | 1.91                | 0.00008            |
| RODINA          | 0.37               | 0.02                | 5.26                | 0.000              | 0.98                 | 0.06              | 0.09                | 0.07               | 0.02                 | 0.95                | 0.00001            |
| S 101           | 1.04               | 0.04                | 7.24                | 0.026              | 1.77                 | 0.35              | 0.12                | 0.27               | 0.04                 | 0.95                | 0.00001            |
| SAFARI          | 0.45               | 0.13                | 8.13                | 0.002              | 1.68                 | 0.68              | 0.15                | 0.12               | 0.12                 | 1.19                | 0.00002            |
| SAVIO           | 0.93               | 0.04                | 5.10                | 0.015              | 1.62                 | 0.27              | 0.29                | 0.25               | 0.04                 | 1.87                | 0.00002            |
| SELENIO         | 1.49               | 0.36                | 8.49                | 0.051              | 2.39                 | 0.75              | 3.35                | 0.59               | 0.35                 | 1.82                | 0.00016            |
| SENIA           | 0.79               | 0.25                | 2.74                | 0.011              | 3.47                 | 1.53              | 0.32                | 0.13               | 0.24                 | 0.73                | 0.00008            |
| SEZIA           | 0.95               | 0.03                | 18.64               | 0.015              | 2.61                 | 0.59              | 0.53                | 0.21               | 0.02                 | 2.20                | 0.00006            |
| SR 113          | 0.94               | 0.56                | 12.00               | 0.019              | 1.74                 | 0.76              | 0.79                | 0.18               | 0.58                 | 1.36                | 0.00004            |
| TOPAZIO         | 0.67               | 0.04                | 14.11               | 0.003              | 5.69                 | 0.22              | 0.60                | 0.19               | 0.04                 | 1.86                |                    |
| UPLA            | 0.91               | 0.04                | 15.68               | 0.001              | 6.36                 | 0.31              | 1.05                | 0.11               | 0.05                 | 1.75                | 0.00005            |
| VALTEJO         | 0.93               | 0.01                | 10.33               | 0.029              | 2.25                 | 0.11              | 0.32                | 0.42               | 0.02                 | 1.68                | 0.00001            |
| VIALONE         | 0.69               | 0.06                | 4.85                | 0.000              | 2.41                 | 0.09              | 0.20                | 0.12               | 0.05                 | 1.72                | 0.00001            |
| VICTORIA        | 0.69               | 0.10                | 1.47                | 0.035              | 2.30                 | 0.30              | 0.59                | 0.23               | 0.09                 | 1.62                | 0.00729            |
| VOLANO          | 0.77               | 0.21                | 3.02                | 0.011              | 2.36                 | 1.54              | 0.43                | 0.18               | 0.22                 | 2.02                | 0.00057            |

## References

- Agrawal GK, Rakwal R, Jwa NS.** 2001. Differential induction of three pathogenesis-related genes, *PR10*, *PR1b* and *PR5* by the ethylene generator ethephon under light and dark in rice (*Oryza sativa* L.) seedlings. *Journal of Plant Physiology* **158**, 133–137.
- Delteil A, Blein M, Faivre-Rampant O, Guellim A, Estevan J, Hirsch J, Bevitori R, Michel C, Morel JB.** 2012. Building a mutant resource for the study of disease resistance in rice reveals the pivotal role of several genes involved in defence. *Molecular Plant Pathology* **13**, 72–82.
- Du H, Wu N, Fu J, Wang S, Li X, Xiao J, Xiong L.** 2012. A GH3 family member, OsGH3-2, modulates auxin and abscisic acid levels and differentially affects drought and cold tolerance in rice. *Journal of Experimental Botany* **63**, 6467–6480.
- Feng JX, Cao L, Li J, et al.** 2011. Involvement of OsNPR1/NH1 in rice basal resistance to blast fungus *Magnaporthe oryzae*. *European Journal of Plant Pathology* **131**, 221–235.
- Hann LW, Sakamoto T, Kawasaki T, Umemura K, Shimamoto K.** 2004. Down-regulation of metallothionein, a reactive oxygen scavenger, by the small GTPase OsRac1 in rice. *Plant Physiology* **135**, 1447–1456.
- Livak KJ, Schmittgen TD.** 2001. Analysis of relative gene expression data using real-time quantitative PCR and the  $2^{-\Delta\Delta CT}$  method. *Methods* **25**, 402–408.
- Shimono M, Sugano S, Nakayama A, Jiang CJ, Ono K, Toki S, Takatsuji H.** 2007. Rice WRKY45 plays a crucial role in benzothiadiazole-inducible blast resistance. *Plant Cell* **19**, 2064–2076.
- Vergne E, Grand X, Ballini E, Chalvon V, Saindrenan P, Tharreau D, Nottéghem JL, Morel JB.** 2010. Preformed expression of defense is a hallmark of partial resistance to rice blast fungal pathogen *Magnaporthe oryzae*. *BMC Plant Biology* **10**.
- Yuan Y, Zhong S, Li Q, et al.** 2007. Functional analysis of rice *NPRI*-like genes reveals that *OsNPRI/NH1* is the rice orthologue conferring disease resistance with enhanced herbivore susceptibility. *Plant Biotechnology Journal* **5**, 313–324.
